# Supplementary material for: Healthcare and Economic Impact of Lung Perfusion Scintigraphy in Patients Affected by Acute Pulmonary Embolism
Source: MDPI journal article supplement (doi:10.3390/healthcare9060716), 2021-06-10
Supplement: s1 [file s1]

Supplementary Material

**Table S1.** One-way sensitivity analysis of the per-patient cost difference between the two strategies (top influencing variables).

| Model Variable |                                             |                        |             |                         | Impact on the measured value | Measured Value<br>(basal case = 2,767.20€) |                                         |                 |
|----------------|---------------------------------------------|------------------------|-------------|-------------------------|------------------------------|--------------------------------------------|-----------------------------------------|-----------------|
| Ran<br>k       | Name                                        | Lowest Value<br>(-25%) | Basal Value | Highest Value<br>(+25%) |                              | With model variable at<br>Lowest value     | With model variable at<br>Highest value | Variable Impact |
| 1              | Cost of ordinary hospitalisation            | 3,006.75 €             | 4,009.00 €  | 5,011.25 €              | Increase                     | 2,063.81 €                                 | 3,470.59 €                              | 95.0%           |
| 2              | Percentage subjects discharged after 1 day  | 12.2%                  | 16.2%       | 20.3%                   | Decrease                     | 2,887.93 €                                 | 2,643.45 €                              | 2.9%            |
| 3              | Prevalence of high-risk patients            | 8.3%                   | 11.1%       | 13.8%                   | Decrease                     | 2,861.42 €                                 | 2,673.04 €                              | 1.7%            |
| 4              | Prevalence of medium-risk patients          | 3.9%                   | 5.2%        | 6.5%                    | Decrease                     | 2,811.74 €                                 | 2,722.69 €                              | 0.4%            |
| 5              | Cost of LPS                                 | 51.36 €                | 68.48 €     | 85.60 €                 | Decrease                     | 2,784.32 €                                 | 2,750.08 €                              | 0.1%            |
| 6              | Cost of 1d-lasting ordinary hospitalisation | 303.75 €               | 405.00 €    | 506.25 €                | Increase                     | 2,753.46 €                                 | 2,780.94 €                              | 0.0%            |

**Table S2.** One-way sensitivity analysis of the per-patient cost of the LPS strategy (top influencing variables).

| Model Variable |                                        |                           |                |                            | Impact on the measured value | Measured Value<br>(basal case = 2,145.25€) |                                            |                    |
|----------------|----------------------------------------|---------------------------|----------------|----------------------------|------------------------------|--------------------------------------------|--------------------------------------------|--------------------|
| Ran<br>k       | Name                                   | Lowest<br>value<br>(-25%) | Basal<br>Value | Highest<br>Value<br>(+25%) |                              | With model<br>variable at<br>Lowest value  | With model<br>variable at<br>Highest value | Variable<br>Impact |
| 1              | Prevalence of high-risk patients       | 8.3%                      | 11.1%          | 13.8%                      | Increase                     | 1,688.35 €                                 | 2,601.85 €                                 | 58.1%              |
| 2              | Cost of intensive care hospitalisation | 1,350.00 €                | 1,800.00 €     | 2,250.00 €                 | Increase                     | 1,797.15 €                                 | 2,493.36 €                                 | 33.7%              |
| 3              | Cost of ordinary hospitalisation       | 3,006.75 €                | 4,009.00 €     | 5,011.25 €                 | Increase                     | 1,982.37 €                                 | 2,308.13 €                                 | 7.4%               |
| 4              | Prevalence of medium-Risk patients     | 3.9%                      | 5.2%           | 6.5%                       | Increase                     | 2,093.12 €                                 | 2,197.35 €                                 | 0.8%               |
| 5              | Cost of LPS                            | 51.36 €                   | 68.48 €        | 85.60 €                    | Increase                     | 2,128.13 €                                 | 2,162.37 €                                 | 0.1%               |

**Table S3.** One-way sensitivity analysis of the per-patient cost of the strategy not adopting LPS (top influencing variables).

| Rank | Model Variable                              |                        |             |                         | Impact on the measured value | Measured Value<br>(basal case = 4,912.45€) |                                         | Variable Impact |
|------|---------------------------------------------|------------------------|-------------|-------------------------|------------------------------|--------------------------------------------|-----------------------------------------|-----------------|
|      | Name                                        | Lowest value<br>(-25%) | Basal Value | Highest Value<br>(+25%) |                              | With model variable at<br>Lowest value     | With model variable at<br>Highest value |                 |
| 1    | Cost of ordinary hospitalisation            | 3,006.75 €             | 4,009.00 €  | 5,011.25 €              | Increase                     | 4,046.18 €                                 | 5,778.72 €                              | 73,7%           |
| 2    | Prevalence of high-risk patients            | 8.3%                   | 11.1%       | 13.8%                   | Increase                     | 4,549.77 €                                 | 5,274.89 €                              | 12,9%           |
| 3    | Cost of intensive care hospitalisation      | 1,350.00 €             | 1,800.00 €  | 2,250.00 €              | Increase                     | 4,564.35 €                                 | 5,260.56 €                              | 11,9%           |
| 4    | Percentage subjects discharged after 1 day  | 12.2%                  | 16.2%       | 20.3%                   | Decrease                     | 5,033.18 €                                 | 4,788,70 €                              | 1,5%            |
| 5    | Cost of 1d-lasting ordinary hospitalisation | 303.75 €               | 405.00 €    | 506.25 €                | Increase                     | 4,898.71 €                                 | 4,926.19 €                              | 0.0%            |
